# Supplementary material for: Reconceptualizing synergism and antagonism among multiple stressors
Source: PubMed Central journal article supplement (PMC4395182; doi:10.1002/ece3.1465), 2015-03-11

## Double negative (n=70)

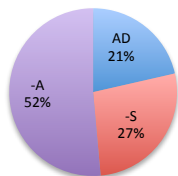

## Double positive (n=38)

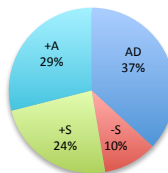

## Opposing (n=49)

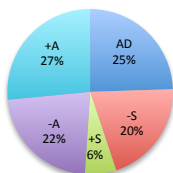

## Negative Neutral (n=9)

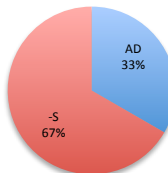

## Positive Neutral (n=3)

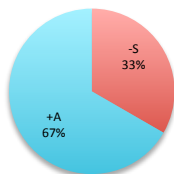

## Double Neutral (n=1)

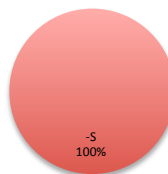

## Total (n=170)

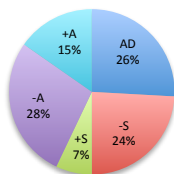

## Total w/o direction (n=170)

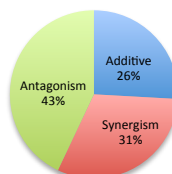

Supplement: ece30005-1538-sd1.pdf [file ece30005-1538-sd1.pdf]
